# Supplementary material for: Lipid modified polyelectrolyte microcapsules with controlled diffusion
Source: Royal Society of Chemistry journal article supplement (doi:10.1039/b415774e), 2005-01-01
Supplement: b415774e.pdf [file b415774e.pdf]

# Lipid modified polyelectrolyte microcapsules with controlled diffusion

Gopal Krishna,<sup>a,b</sup> Tatsiana Shutava\*<sup>a</sup> and Yuri Lvov<sup>a,b</sup>

<sup>a</sup>Institute for Micromanufacturing and <sup>b</sup>Department of Biomedical Engineering,  
Louisiana Tech University, 911 Hergot Ave, Ruston LA 71272, USA  
E-mail: tshutava@latech.edu, FAX: 318-257-5104

## Supplementary information

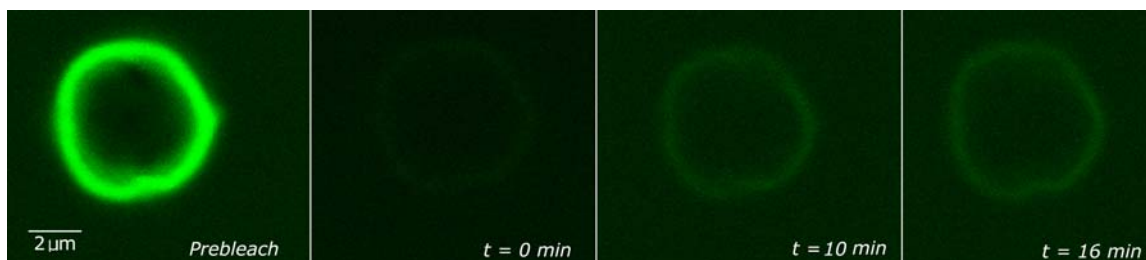

A

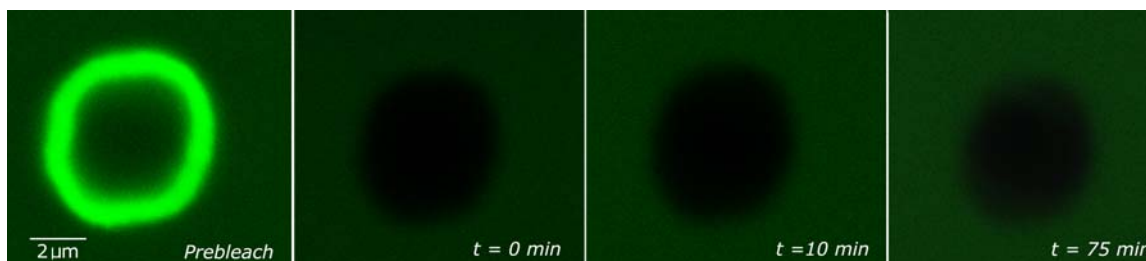

B

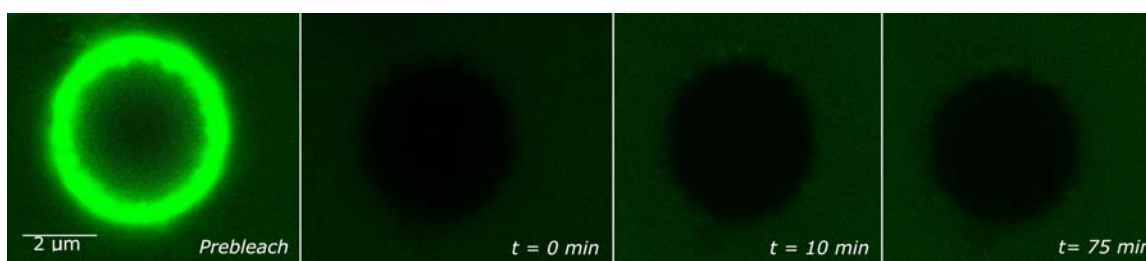

C

Fig. A. Fluorescence recovery after photobleaching for different capsules in a 10 μM solution of FITC-dextran of MW 4300: a) an uncoated (PSS/PAH)<sub>5</sub> capsule, b) a capsule coated with one bilayer of PG-PC (20 % w/w) and c) a capsule coated with one bilayer of DPPA- DPPC (20% w/w).
